# Supplementary material for: Use of acetaminophen and risk of endometrial cancer: evidence from observational studies
Source: PubMed Central journal article supplement (PMC5470998; doi:10.18632/oncotarget.16663), 2017-03-29
Supplement: oncotarget-08-34643-s001.pdf [file oncotarget-08-34643-s001.pdf]

## Use of acetaminophen and risk of endometrial cancer: evidence from observational studies

### Supplementary Materials

#### Supplementary Table 1: Methodological quality of cohort studies included in the systematic review and meta-analysis

| First author [reference], year | Representativeness of the exposed cohort | Selection of the unexposed cohort | Ascertainment of exposure | Outcome of interest not present at start of study | Control for important factor or additional factor † | Assessment of outcome | Follow-up long enough for outcomes to occur‡ | Adequacy of follow-up of cohorts§ |
|--------------------------------|------------------------------------------|-----------------------------------|---------------------------|---------------------------------------------------|-----------------------------------------------------|-----------------------|----------------------------------------------|-----------------------------------|
| Setiawan [16], 2012            | *                                        | *                                 | *                         | *                                                 | **                                                  | *                     | *                                            | *                                 |
| Walter [17], 2011              | *                                        | *                                 | *                         | *                                                 | **                                                  | *                     | -                                            | *                                 |
| Viswanathan [19], 2008         | *                                        | *                                 | *                         | *                                                 | **                                                  | *                     | *                                            | *                                 |
| Friis [21], 2002               | *                                        | *                                 | *                         | *                                                 | -                                                   | *                     | -                                            | *                                 |

†A maximum of 2 stars could be awarded for this item. Studies that controlled for body mass index received one star, whereas studies that controlled for other important confounders such as parity, oral contraceptive use, hormone replacement therapy received an additional star.

‡A cohort study with a median follow-up time >10 years was assigned one star.

§A cohort study with a follow-up rate > 75% was assigned one star.

#### Supplementary Table 2: Methodological quality of case-control studies included in the systematic review and meta-analysis

| First author [reference], year | Adequate definition of cases | Representativeness of cases | Selection of control subjects | Definition of control subjects | Control for important factor or additional factor† | Exposure assessment | Same method of ascertainment for all subjects | Non response Rate‡ |
|--------------------------------|------------------------------|-----------------------------|-------------------------------|--------------------------------|----------------------------------------------------|---------------------|-----------------------------------------------|--------------------|
| Neill [15], 2013               | *                            | *                           | *                             | *                              | **                                                 | *                   | *                                             | -                  |
| Bodelon [18], 2009             | *                            | *                           | *                             | *                              | **                                                 | *                   | *                                             | *                  |
| Moysich [20], 2005             | *                            | *                           | -                             | *                              | **                                                 | *                   | *                                             | -                  |

†A maximum of 2 stars could be awarded for this item. Studies that controlled for body mass index received one star, whereas studies that controlled for other important confounders such as parity, oral contraceptive use received an additional star.

‡One star was assigned if there was no significant difference in the response rate between control subjects and cases by using the chi-square test ( $P > 0.05$ ).
